# Supplementary material
Source: PubMed Central journal article supplement (PMC7724352)
Supplement: ajtr0012-7262-f7.pdf [file ajtr0012-7262-f7.pdf]

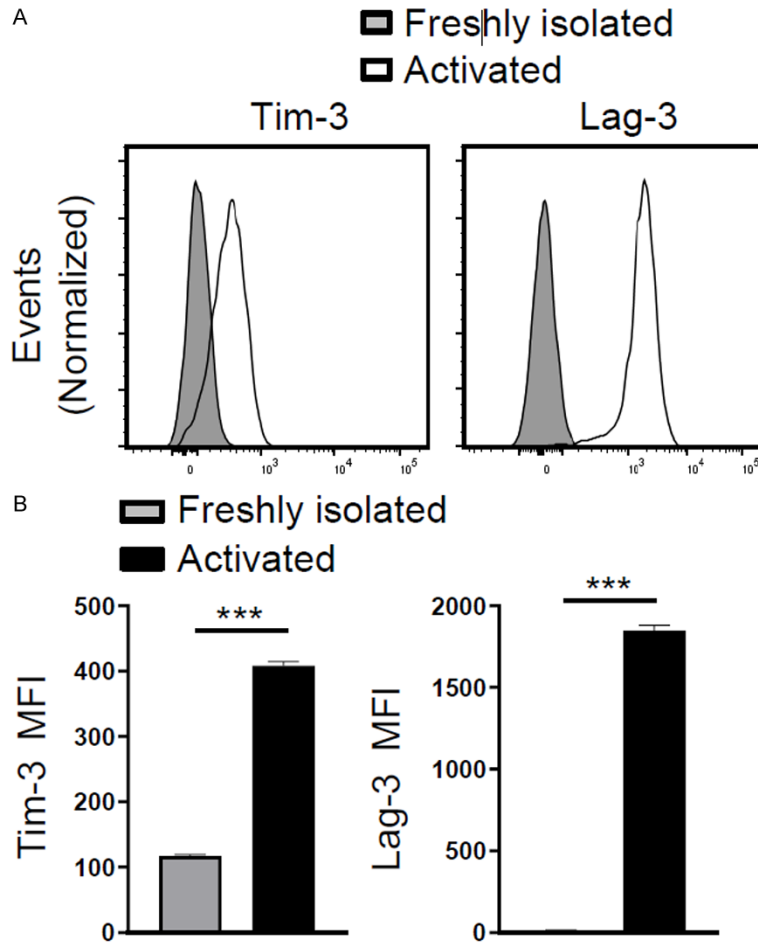

**Figure S1.** Expression of inhibitory receptors on Pmel-1 CD8<sup>+</sup> cells during killing of B16F10 cells, related to **Figure 3**. The freshly isolated or the activated Pmel-1 splenocytes were co-cultured with B16F10 target cells at a CD8<sup>+</sup> effector to target ratio of 40:1 for 10 hours, followed by flow cytometry analysis. A. Histograms show Tim-3 and Lag-3 expressions on Pmel-1 CD8<sup>+</sup> T cells. B. MFI levels of Tim-3 and Lag-3 expressed by Pmel-1 CD8<sup>+</sup> T cells. Data are presented by mean ± SD (n=5). \*\*\**P* < 0.001; unpaired student's *t*-test.
